# Supplementary material
Source: Springer Nature journal article supplement (https://www.springermedizin.de/resource/supplementary/12885_2008_1567_MOESM2_ESM.pdf/9472340)

A. Hep 3B control

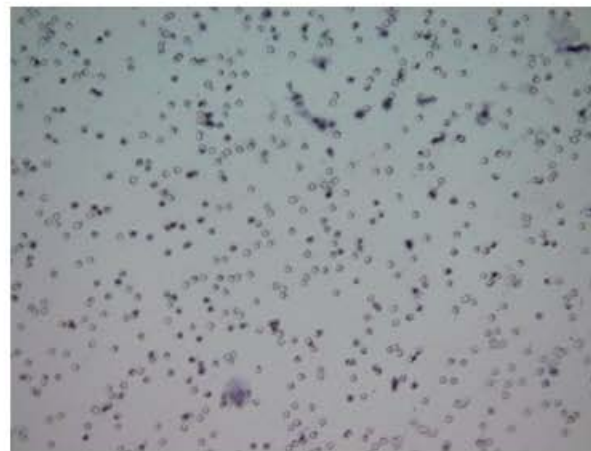

B. Ezrin

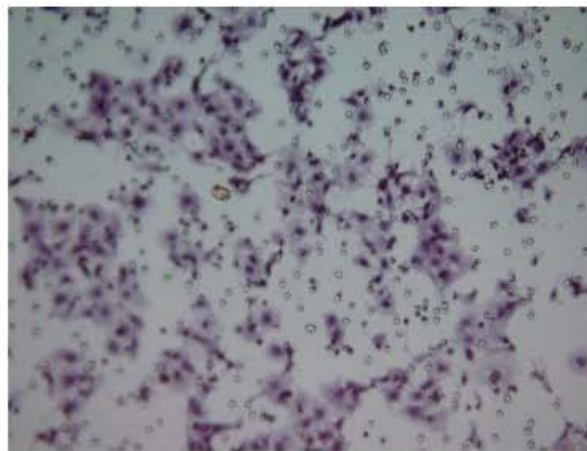

C. Y353 mutant

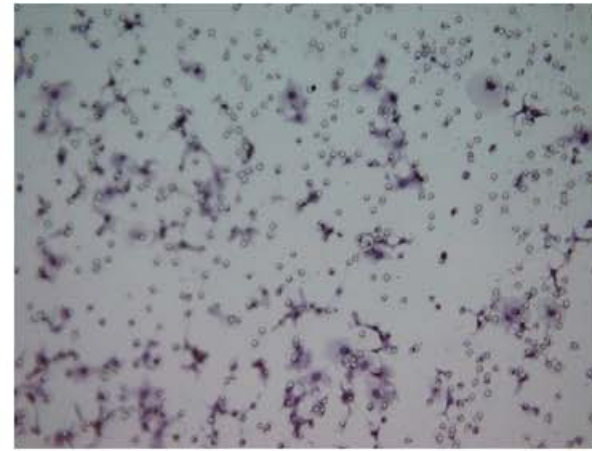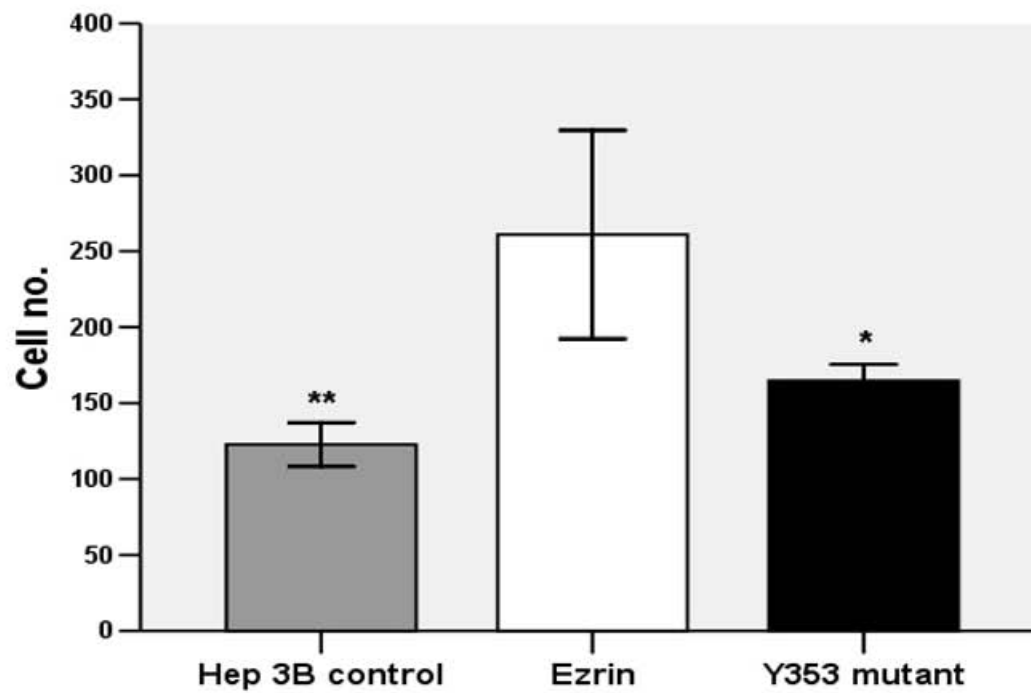

Supplement: MOESM2 [file 9472340]
